# Supplementary material
Source: PubMed Central journal article supplement (PMC7311289)
Supplement: NIHMS1595216-supplement-Supplemental_Material.pdf [file NIHMS1595216-supplement-Supplemental_Material.pdf]

**Combining Imaging and Genetics to Predict Recurrence of  
Anticoagulation-Associated Intracerebral Hemorrhage**

Biffi A. et al.

**SUPPLEMENTAL MATERIAL**

**Supplementary Table I. Univariable Analyses of ICH Recurrence**

| <b>Variable</b>                                          | <b>Hazard Ratio<br/>(95% CI)</b> | <b>p</b>     |
|----------------------------------------------------------|----------------------------------|--------------|
| Age (per 10 years)                                       | 1.05 (1.01 - 1.10)               | <b>0.030</b> |
| Sex (Male)                                               | 0.78 (0.53 - 1.16)               | 0.23         |
| Race / Ethnicity                                         |                                  |              |
| - White                                                  | Ref.                             | Ref.         |
| - Black                                                  | 1.29 (0.99 - 1.68)               | 0.061        |
| - Hispanic                                               | 1.37 (0.97 - 1.94)               | 0.077        |
| - Other                                                  | 0.78 (0.54 - 1.13)               | 0.20         |
| Education (> 12 years)                                   | 0.88 (0.76 - 1.01)               | 0.079        |
| Hypertension                                             | 0.81 (0.60 - 1.09)               | 0.17         |
| Diabetes Mellitus                                        | 1.39 (0.67 - 2.89)               | 0.39         |
| Coronary Artery Disease                                  | 0.93 (0.82 - 1.06)               | 0.28         |
| APOE ε2 or ε4 (≥ 1 copy)                                 | 2.06 (1.19 - 3.56)               | <b>0.010</b> |
| ICH Location (Lobar)                                     | 1.78 (1.12 - 2.83)               | <b>0.015</b> |
| ICH Volume (per 10 cc)                                   | 1.18 (0.96 - 1.45)               | 0.13         |
| IVH Presence                                             | 1.25 (0.87 - 1.79)               | 0.23         |
| Lobar CMBs<br>(per each additional CMB)                  | 1.93 (1.14 - 3.28)               | <b>0.016</b> |
| Non-lobar CMBs<br>(per each additional CMB)              | 1.25 (0.89 - 1.75)               | 0.21         |
| Increasing CSS Severity<br>(None - Focal - Disseminated) | 1.73 (1.09 - 2.74)               | <b>0.021</b> |

Results derived from combined analysis of MGH-ICH and ERICH data (n = 230)

Abbreviations: 95% CI = 95% Confidence Interval, CMB = Cerebral Microbleeds, HR = Hazard Ratio, ICH = Intracerebral Hemorrhage, IVH = Intraventricular Hemorrhage, OAT = Oral Anticoagulation

**Supplementary Table II. Multivariable Analysis of ICH Recurrence Risk after Lobar Anticoagulation-related ICH**

| <i>Variables</i>                                         | <b>HR</b> | <b>95% CI</b> | <b>P</b>     |
|----------------------------------------------------------|-----------|---------------|--------------|
| Age (per 10 years)                                       | 1.05      | 0.99 - 1.11   | 0.099        |
| Education (> 12 years)                                   | 0.85      | 0.69 - 1.05   | 0.14         |
| Lobar CMBs (per each additional CMB)                     | 1.74      | 1.09 - 2.77   | <b>0.022</b> |
| Increasing CSS Severity<br>(None - Focal - Disseminated) | 1.64      | 1.14 - 2.36   | <b>0.009</b> |
| APOE ε2 or ε4 (≥ 1 copy)                                 | 2.15      | 1.20 - 3.85   | <b>0.011</b> |

Results derived from combined analysis of MGH-ICH and ERICH data (n = 230)

Abbreviations: 95% CI = 95% Confidence Interval, APOE = Apolipoprotein E, CSS = Cortical Superficial Siderosis, CMB = Cerebral Microbleeds, HR = Hazard Ratio, ICH = Intracerebral Hemorrhage

**Supplementary Table III. Multivariable Analysis of ICH Recurrence Risk after Non-lobar Anticoagulation-related ICH**

| <i>Variables</i>                                         | <b>HR</b> | <b>95% CI</b> | <b>P</b>     |
|----------------------------------------------------------|-----------|---------------|--------------|
| Age (per 10 years)                                       | 1.09      | 0.90 - 1.32   | 0.40         |
| Education (> 12 years)                                   | 0.81      | 0.54 - 1.21   | 0.33         |
| Lobar CMBs (per each additional CMB)                     | 1.52      | 1.04 - 2.22   | <b>0.035</b> |
| Increasing CSS Severity<br>(None - Focal - Disseminated) | 1.37      | 1.01 - 1.86   | <b>0.046</b> |
| APOE $\epsilon$ 2 or $\epsilon$ 4 ( $\geq 1$ copy)       | 1.69      | 1.06 - 2.69   | <b>0.031</b> |

Results derived from combined analysis of MGH-ICH and ERICH data (n = 230)

Abbreviations: 95% CI = 95% Confidence Interval, APOE = Apolipoprotein E, CSS = Cortical Superficial Siderosis, CMB = Cerebral Microbleeds, HR = Hazard Ratio, ICH = Intracerebral Hemorrhage
